# Supplementary material for: Polylactic Acid/Polycaprolactone Blends: On the Path to Circular Economy, Substituting Single-Use Commodity Plastic Products
Source: PubMed Central journal article supplement (PMC7321633; doi:10.3390/ma13112655), 2020-06-10
Supplement: materials-13-02655-s001.pdf [file materials-13-02655-s001.pdf]

Article

# Polylactic Acid/Polycaprolactone Blends: On the Path to Circular Economy, Substituting Single-Use Commodity Plastic Products

Marc Delgado-Aguilar <sup>1,2,\*</sup>, Rita Puig <sup>1</sup>, Ilija Sazdovski <sup>2</sup> and Pere Fullana-i-Palmer <sup>2</sup>

<sup>1</sup> ABBU research group. Department of Computer Science and Industrial Engineering, Universitat de Lleida (UdL), Pla de la Massa 8, 08700 Igualada, Spain; rita.puig@udl.cat

<sup>2</sup> UNESCO Chair in Life Cycle and Climate Change ESCI-UPF, Universitat Pompeu Fabra. Passeig Pujades 1, 08003 Barcelona, Spain; ilija.sazdovski@esci.upf.edu (I.S.); pere.fullana@esci.upf.edu (P.F.P.)

\* Correspondence: mda13@alumnes.udl.cat

Received: 20 May 2020; Accepted: 8 June 2020; Published: date

**Table S1.** List of polypropylene homopolymer.

| Polypropylene, Homopolymer         |                                 |                                                                                                                                                                                                         |
|------------------------------------|---------------------------------|---------------------------------------------------------------------------------------------------------------------------------------------------------------------------------------------------------|
| Producer                           | Product Reference               | Reference                                                                                                                                                                                               |
| Aclo Accucomp                      | HPO306 Homopolymer              | <a href="http://matweb.com/search/DataSheet.aspx?MatGUID=ec6a423060864423a465d50f86d69d4c">http://matweb.com/search/DataSheet.aspx?MatGUID=ec6a423060864423a465d50f86d69d4c</a>                         |
| Aclo Accucomp                      | HPO309L Homopolymer             | <a href="http://matweb.com/search/DataSheet.aspx?MatGUID=c1892f6331d444e3930b183a8307b3b0">http://matweb.com/search/DataSheet.aspx?MatGUID=c1892f6331d444e3930b183a8307b3b0</a>                         |
| Borealis                           | Daploy WB140HMS                 | <a href="http://matweb.com/search/DataSheet.aspx?MatGUID=2e64444aa5b24dabade4ac0747421221">http://matweb.com/search/DataSheet.aspx?MatGUID=2e64444aa5b24dabade4ac0747421221</a>                         |
| Dow/DuPont                         | D114.01                         | <a href="http://matweb.com/search/DataSheet.aspx?MatGUID=3fad3d1abcb54ed79df43ee103cb2327&amp;cckck=1">http://matweb.com/search/DataSheet.aspx?MatGUID=3fad3d1abcb54ed79df43ee103cb2327&amp;cckck=1</a> |
| Dow/DuPont                         | INSPIRE™<br>Performance Polymer | 112 <a href="http://matweb.com/search/DataSheet.aspx?MatGUID=70bb049f3cc84ebca81c0c0731480481">http://matweb.com/search/DataSheet.aspx?MatGUID=70bb049f3cc84ebca81c0c0731480481</a>                     |
| Lyondell Basell                    | EA600P                          | <a href="http://matweb.com/search/DataSheet.aspx?MatGUID=5f42020a8bb043d6a69ad979439c547a">http://matweb.com/search/DataSheet.aspx?MatGUID=5f42020a8bb043d6a69ad979439c547a</a>                         |
| Addiplast                          | Addilene H 652                  | <a href="http://matweb.com/search/DataSheet.aspx?MatGUID=1faa76ca2fda45d18799e3001a2a6759">http://matweb.com/search/DataSheet.aspx?MatGUID=1faa76ca2fda45d18799e3001a2a6759</a>                         |
| Addiplast                          | Addilene H 242 M40              | <a href="http://matweb.com/search/DataSheet.aspx?MatGUID=49d97633191f45a4b0ddd4b1c7e55673">http://matweb.com/search/DataSheet.aspx?MatGUID=49d97633191f45a4b0ddd4b1c7e55673</a>                         |
| Addiplast                          | Addilene H 442 M30              | <a href="http://matweb.com/search/DataSheet.aspx?MatGUID=752a30ace126432da449f2e905cc444f">http://matweb.com/search/DataSheet.aspx?MatGUID=752a30ace126432da449f2e905cc444f</a>                         |
| Addiplast                          | Addilene H 520 M40              | <a href="http://matweb.com/search/DataSheet.aspx?MatGUID=3dc0dae7784842bfbfe909cd725ee922">http://matweb.com/search/DataSheet.aspx?MatGUID=3dc0dae7784842bfbfe909cd725ee922</a>                         |
| Lati Industria Termoplastici S.P.A | Latene® 11 MDT05-01             | <a href="http://matweb.com/search/DataSheet.aspx?MatGUID=1f740441651f423fb14ca4732ab94583">http://matweb.com/search/DataSheet.aspx?MatGUID=1f740441651f423fb14ca4732ab94583</a>                         |
| Lati Industria Termoplastici S.P.A | Latigray 52/11-01 CX/45         | <a href="http://matweb.com/search/DataSheet.aspx?MatGUID=6c2157f3341a495994199797e6e7d812">http://matweb.com/search/DataSheet.aspx?MatGUID=6c2157f3341a495994199797e6e7d812</a>                         |

|                               |                               |                                                                                                                                                                                 |
|-------------------------------|-------------------------------|---------------------------------------------------------------------------------------------------------------------------------------------------------------------------------|
| Manifattura<br>Cattaneo S.P.A | PP H Polypropylene            | <a href="http://matweb.com/search/DataSheet.aspx?MatGUID=a10aa0acf11e4995a41229df7194d67e">http://matweb.com/search/DataSheet.aspx?MatGUID=a10aa0acf11e4995a41229df7194d67e</a> |
| Ineos                         | H25E-00                       | <a href="http://matweb.com/search/DataSheet.aspx?MatGUID=87734ccab7dd4bcf8a31ccd20bd851b0">http://matweb.com/search/DataSheet.aspx?MatGUID=87734ccab7dd4bcf8a31ccd20bd851b0</a> |
| LNP (GE Plastics<br>Company)  | Colorcomp® M-100 HS<br>GN4-52 | <a href="http://matweb.com/search/DataSheet.aspx?MatGUID=33daba79f3b54c02b8d0c37631123b12">http://matweb.com/search/DataSheet.aspx?MatGUID=33daba79f3b54c02b8d0c37631123b12</a> |
| LNP (GE Plastics<br>Company)  | Stat-Loy® M-<br>Polypropylene | <a href="http://matweb.com/search/DataSheet.aspx?MatGUID=d0f2f19417d940ef83ce850fd7f43f9f">http://matweb.com/search/DataSheet.aspx?MatGUID=d0f2f19417d940ef83ce850fd7f43f9f</a> |
| Trinseo                       | INSPIRE™ TF3800               | <a href="http://matweb.com/search/DataSheet.aspx?MatGUID=1c55e00505e74eb9a45b1dd0a4cd12d1">http://matweb.com/search/DataSheet.aspx?MatGUID=1c55e00505e74eb9a45b1dd0a4cd12d1</a> |

Table S2. List of polypropylene copolymer.

| Polypropylene, Copolymer              |                        |                                                                                                                                                                                 |
|---------------------------------------|------------------------|---------------------------------------------------------------------------------------------------------------------------------------------------------------------------------|
| Producer                              | Product Reference      | Reference                                                                                                                                                                       |
| Aclo Accucomp                         | CPO407L                | <a href="http://matweb.com/search/DataSheet.aspx?MatGUID=4bad29c7efea4a2f9c6f0195da2a6353">http://matweb.com/search/DataSheet.aspx?MatGUID=4bad29c7efea4a2f9c6f0195da2a6353</a> |
| Aclo Accucomp                         | CPO406L                | <a href="http://matweb.com/search/DataSheet.aspx?MatGUID=51236c4a5bb141f3b80b4d824a760e13">http://matweb.com/search/DataSheet.aspx?MatGUID=51236c4a5bb141f3b80b4d824a760e13</a> |
| Addiplast                             | Addilene J 220 M40     | <a href="http://matweb.com/search/DataSheet.aspx?MatGUID=f4fc7c1ce2c848458d8f6e6d468d9ed1">http://matweb.com/search/DataSheet.aspx?MatGUID=f4fc7c1ce2c848458d8f6e6d468d9ed1</a> |
| Addiplast                             | Addilene J 520 M40     | <a href="http://matweb.com/search/DataSheet.aspx?MatGUID=bdad7169001f43f8b22a6b38d1289165">http://matweb.com/search/DataSheet.aspx?MatGUID=bdad7169001f43f8b22a6b38d1289165</a> |
| Ineos                                 | R01A-00                | <a href="http://matweb.com/search/DataSheet.aspx?MatGUID=c99c6640fd45446aab61e43571dd2c93">http://matweb.com/search/DataSheet.aspx?MatGUID=c99c6640fd45446aab61e43571dd2c93</a> |
| Lati Industria<br>Termoplastici S.P.A | Latigray 47/1-01 CX/45 | <a href="http://matweb.com/search/DataSheet.aspx?MatGUID=f1675053a8b848c193456c800a40ef71">http://matweb.com/search/DataSheet.aspx?MatGUID=f1675053a8b848c193456c800a40ef71</a> |
| Lati Industria<br>Termoplastici S.P.A | Latimass 47/7-04 D008  | <a href="http://matweb.com/search/DataSheet.aspx?MatGUID=9ba81777284e46a39a9fb4b067e9361c">http://matweb.com/search/DataSheet.aspx?MatGUID=9ba81777284e46a39a9fb4b067e9361c</a> |
| Lati Industria<br>Termoplastici S.P.A | Latistat 47/7-03       | <a href="http://matweb.com/search/DataSheet.aspx?MatGUID=1c8eda36ae6c4bd4a397805d48d5399e">http://matweb.com/search/DataSheet.aspx?MatGUID=1c8eda36ae6c4bd4a397805d48d5399e</a> |

Table S3. List of high density polyethylene.

| HDPE            |                   |                                                                                                                                                                                 |
|-----------------|-------------------|---------------------------------------------------------------------------------------------------------------------------------------------------------------------------------|
| Producer        | Product Reference | Reference                                                                                                                                                                       |
| Aclo Accucomp   | HD0202L           | <a href="http://matweb.com/search/DataSheet.aspx?MatGUID=f1755a4ccfda4e0e9d6f406c3f99bfb5">http://matweb.com/search/DataSheet.aspx?MatGUID=f1755a4ccfda4e0e9d6f406c3f99bfb5</a> |
| Aclo Accucomp   | HD0205L           | <a href="http://matweb.com/search/DataSheet.aspx?MatGUID=174ecdea264d41f383b65f18376d3ff2">http://matweb.com/search/DataSheet.aspx?MatGUID=174ecdea264d41f383b65f18376d3ff2</a> |
| Lyondell Basell | Alathon® M5372    | <a href="http://matweb.com/search/DataSheet.aspx?MatGUID=4d2ec186ebb14af9a7bbfcc3d7d60c65">http://matweb.com/search/DataSheet.aspx?MatGUID=4d2ec186ebb14af9a7bbfcc3d7d60c65</a> |
| Lyondell Basell | Alathon® H4620    | <a href="http://matweb.com/search/DataSheet.aspx?MatGUID=7100107286ff47f192678fd372498f9c">http://matweb.com/search/DataSheet.aspx?MatGUID=7100107286ff47f192678fd372498f9c</a> |

|                                    |                   |                                                                                                                                                                                 |
|------------------------------------|-------------------|---------------------------------------------------------------------------------------------------------------------------------------------------------------------------------|
| ExxonMobil Chemical                | Paxon™ AS55-003   | <a href="http://matweb.com/search/DataSheet.aspx?MatGUID=51f0068b4a4145b59e1e3cbe689fa083">http://matweb.com/search/DataSheet.aspx?MatGUID=51f0068b4a4145b59e1e3cbe689fa083</a> |
| Iran Petrochemical Commercial Co.  | EX 1 HF 7740F     | <a href="http://matweb.com/search/DataSheet.aspx?MatGUID=8bcd376dab704fc988c6fb92c69da732">http://matweb.com/search/DataSheet.aspx?MatGUID=8bcd376dab704fc988c6fb92c69da732</a> |
| Lati Industria Termoplastici S.P.A | Latistat 45/7-02  | <a href="http://matweb.com/search/DataSheet.aspx?MatGUID=e68447c7d6a04cbcbf6aed924a7de348">http://matweb.com/search/DataSheet.aspx?MatGUID=e68447c7d6a04cbcbf6aed924a7de348</a> |
| Premix Thermoplastics Inc.         | PRE-ELEC® PE 1295 | <a href="http://matweb.com/search/DataSheet.aspx?MatGUID=cebd5aba5954488a209eee4e1197209">http://matweb.com/search/DataSheet.aspx?MatGUID=cebd5aba5954488a209eee4e1197209</a>   |

Table S4. List of acrylonitrile butadiene styrene.

| ABS           |                                     |                                                                                                                                                                                 |
|---------------|-------------------------------------|---------------------------------------------------------------------------------------------------------------------------------------------------------------------------------|
| Producer      | Product Reference                   | Reference                                                                                                                                                                       |
| Aclo Accucomp | ABS802L                             | <a href="http://matweb.com/search/DataSheet.aspx?MatGUID=5fd1721c268c4f69bd5fbf992cd15a8c">http://matweb.com/search/DataSheet.aspx?MatGUID=5fd1721c268c4f69bd5fbf992cd15a8c</a> |
| Aclo Accucomp | ABS804L                             | <a href="http://matweb.com/search/DataSheet.aspx?MatGUID=26236bd63cf44c869f9a1946cc6b99a2">http://matweb.com/search/DataSheet.aspx?MatGUID=26236bd63cf44c869f9a1946cc6b99a2</a> |
| Aclo Accucomp | ABS801L                             | <a href="http://matweb.com/search/DataSheet.aspx?MatGUID=aae151d3595a4104818b833124ffe303">http://matweb.com/search/DataSheet.aspx?MatGUID=aae151d3595a4104818b833124ffe303</a> |
| Aclo Accucomp | ABS803L                             | <a href="http://matweb.com/search/DataSheet.aspx?MatGUID=cb6d1a8ad959465e8e946c14ad46de91">http://matweb.com/search/DataSheet.aspx?MatGUID=cb6d1a8ad959465e8e946c14ad46de91</a> |
| Gehr Plastics | ABS Acrylonitrile Butadiene Styrene | <a href="http://matweb.com/search/DataSheet.aspx?MatGUID=83a6bf2414554dffafabd9e0816bfa8c">http://matweb.com/search/DataSheet.aspx?MatGUID=83a6bf2414554dffafabd9e0816bfa8c</a> |
| Ineos         | Lustran® M205FC                     | <a href="http://matweb.com/search/DataSheet.aspx?MatGUID=11eadcd4835a444bb121c9a23e672731">http://matweb.com/search/DataSheet.aspx?MatGUID=11eadcd4835a444bb121c9a23e672731</a> |

Table S5. List of polystyrene.

| Polystyrene (PS)           |                           |                                                                                                                                                                                 |
|----------------------------|---------------------------|---------------------------------------------------------------------------------------------------------------------------------------------------------------------------------|
| Producer                   | Product Reference         | Reference                                                                                                                                                                       |
| Dow Chemical               | AIM® 4800                 | <a href="http://matweb.com/search/DataSheet.aspx?MatGUID=d647848b16104eb0978e26437c1e9100">http://matweb.com/search/DataSheet.aspx?MatGUID=d647848b16104eb0978e26437c1e9100</a> |
| Americas Syrenics          | Styron® 685P              | <a href="http://matweb.com/search/DataSheet.aspx?MatGUID=3c98cec5c8ca4317877383003b082926">http://matweb.com/search/DataSheet.aspx?MatGUID=3c98cec5c8ca4317877383003b082926</a> |
| Premix Thermoplastics Inc. | PRE-ELEC® PS 1326         | <a href="http://matweb.com/search/DataSheet.aspx?MatGUID=c68e697c451640afb35a1067821c580d">http://matweb.com/search/DataSheet.aspx?MatGUID=c68e697c451640afb35a1067821c580d</a> |
| Premix Thermoplastics Inc. | PRE-ELEC® PS 1328         | <a href="http://matweb.com/search/DataSheet.aspx?MatGUID=667d096b99d6488383189a6c141f95bf">http://matweb.com/search/DataSheet.aspx?MatGUID=667d096b99d6488383189a6c141f95bf</a> |
| Albis Plastics             | ALCOM® MED PS 1000 14113  | <a href="http://matweb.com/search/DataSheet.aspx?MatGUID=cf4d2324d47d49a5b03fcacd39d0db99">http://matweb.com/search/DataSheet.aspx?MatGUID=cf4d2324d47d49a5b03fcacd39d0db99</a> |
| Styrolution                | Polystyrol 168 N GR 21 PS | <a href="http://matweb.com/search/DataSheet.aspx?MatGUID=beea4f52f84b4db39bd1238e76d1af9a">http://matweb.com/search/DataSheet.aspx?MatGUID=beea4f52f84b4db39bd1238e76d1af9a</a> |

|             |                          |                                                                                                                                                                                 |
|-------------|--------------------------|---------------------------------------------------------------------------------------------------------------------------------------------------------------------------------|
| Styrolution | Polystyrol 495 F GR 2 PS | <a href="http://matweb.com/search/DataSheet.aspx?MatGUID=9313ea581b2b413fb51580f8f3f2df64">http://matweb.com/search/DataSheet.aspx?MatGUID=9313ea581b2b413fb51580f8f3f2df64</a> |
| Styrolution | PS 456EB HIPS            | <a href="http://matweb.com/search/DataSheet.aspx?MatGUID=2af6ee4235464fe5839133dbf0ad29d1">http://matweb.com/search/DataSheet.aspx?MatGUID=2af6ee4235464fe5839133dbf0ad29d1</a> |
| Styrolution | PS 476L HIPS             | <a href="http://matweb.com/search/DataSheet.aspx?MatGUID=67ccec567039436fa2aaaa8d3f007ee7">http://matweb.com/search/DataSheet.aspx?MatGUID=67ccec567039436fa2aaaa8d3f007ee7</a> |
| Styrolution | PS 495F HIPS             | <a href="http://matweb.com/search/DataSheet.aspx?MatGUID=15f758d105e648e7bfc5b656945fdbec">http://matweb.com/search/DataSheet.aspx?MatGUID=15f758d105e648e7bfc5b656945fdbec</a> |
| Styrolution | PS 576H HIPS             | <a href="http://matweb.com/search/DataSheet.aspx?MatGUID=030033e525d24b58b21a2736bbc87b3a">http://matweb.com/search/DataSheet.aspx?MatGUID=030033e525d24b58b21a2736bbc87b3a</a> |
| Chi Mei     | Polyrex® PG-22           | <a href="http://matweb.com/search/DataSheet.aspx?MatGUID=0aea84ce3e734314bc8be6b3d203f938">http://matweb.com/search/DataSheet.aspx?MatGUID=0aea84ce3e734314bc8be6b3d203f938</a> |
| Chi Mei     | Polyrex® PG-33           | <a href="http://matweb.com/search/DataSheet.aspx?MatGUID=ff576d11bc6c449ab32a86ffed358f82">http://matweb.com/search/DataSheet.aspx?MatGUID=ff576d11bc6c449ab32a86ffed358f82</a> |
| Chi Mei     | Polyrex® PG-22           |                                                                                                                                                                                 |
| Chi Mei     | Polyrex® PG-22           |                                                                                                                                                                                 |
| Chi Mei     | Polyrex® PG-22           |                                                                                                                                                                                 |

Table S6. List of polyamide 12.

| Polyamide 12 (PA12) |                                   |                                                                                                                                                                                 |
|---------------------|-----------------------------------|---------------------------------------------------------------------------------------------------------------------------------------------------------------------------------|
| Producer            | Product Reference                 | Reference                                                                                                                                                                       |
| Evonik              | VESTAMID® LX9008                  | <a href="http://matweb.com/search/DataSheet.aspx?MatGUID=07adfdc316e14af0a58d3338ae669c53">http://matweb.com/search/DataSheet.aspx?MatGUID=07adfdc316e14af0a58d3338ae669c53</a> |
| Evonik              | VESTAMID® LX9012                  | <a href="http://matweb.com/search/DataSheet.aspx?MatGUID=1820960db3fe4684b5644333d39c7b2e">http://matweb.com/search/DataSheet.aspx?MatGUID=1820960db3fe4684b5644333d39c7b2e</a> |
| Gehr Plastics       | PA 12 TR                          | <a href="http://matweb.com/search/DataSheet.aspx?MatGUID=4c337df134b54ca594feab74788c9cee">http://matweb.com/search/DataSheet.aspx?MatGUID=4c337df134b54ca594feab74788c9cee</a> |
| EMS-Grivory         | Grivory® L 20 G grey 9280<br>PA12 | <a href="http://matweb.com/search/DataSheet.aspx?MatGUID=da1af78735f94583beb689859cc030ac">http://matweb.com/search/DataSheet.aspx?MatGUID=da1af78735f94583beb689859cc030ac</a> |
| EMS-Grivory         | Grivory® L 25 NZ ESD<br>PA12      | <a href="http://matweb.com/search/DataSheet.aspx?MatGUID=75146c49451845a0ab2e4f1cefa69b22">http://matweb.com/search/DataSheet.aspx?MatGUID=75146c49451845a0ab2e4f1cefa69b22</a> |
| EMS-Grivory         | Grivory® L 25 Z PA12-I            | <a href="http://matweb.com/search/DataSheet.aspx?MatGUID=400ade8581d0492885103ab1852a3cad">http://matweb.com/search/DataSheet.aspx?MatGUID=400ade8581d0492885103ab1852a3cad</a> |
| EMS-Grivory         | Grivory® LM-05 HX nat<br>PA12     | <a href="http://matweb.com/search/DataSheet.aspx?MatGUID=9252cb6fe4cc442f8a3a00e239bed86e">http://matweb.com/search/DataSheet.aspx?MatGUID=9252cb6fe4cc442f8a3a00e239bed86e</a> |
| Sabic               | LNP™ LUBRICOMP™<br>SP003          | <a href="http://matweb.com/search/DataSheet.aspx?MatGUID=299c207bdc3c45129cd4a2adabe29ba9">http://matweb.com/search/DataSheet.aspx?MatGUID=299c207bdc3c45129cd4a2adabe29ba9</a> |

Table S7. List of polyamide 6.

| Polyamide 6 (PA6) |                   |           |
|-------------------|-------------------|-----------|
| Producer          | Product Reference | Reference |

---

|                                       |                                 |                                                                                                                                                                                 |
|---------------------------------------|---------------------------------|---------------------------------------------------------------------------------------------------------------------------------------------------------------------------------|
| Aclo Accucomp                         | Nylon 6 NY0700L                 | <a href="http://matweb.com/search/DataSheet.aspx?MatGUID=be55ac610c4a4b12b523379841a346c5">http://matweb.com/search/DataSheet.aspx?MatGUID=be55ac610c4a4b12b523379841a346c5</a> |
| BASF                                  | Ultramid® 8202 PA6              | <a href="http://matweb.com/search/DataSheet.aspx?MatGUID=d8d83fe59e0b47148639f58bf2642638">http://matweb.com/search/DataSheet.aspx?MatGUID=d8d83fe59e0b47148639f58bf2642638</a> |
| BASF                                  | Ultramid® 8253 PA6              | <a href="http://matweb.com/search/DataSheet.aspx?MatGUID=fd18fb2b0fc84260829dcd49e91f2e6a">http://matweb.com/search/DataSheet.aspx?MatGUID=fd18fb2b0fc84260829dcd49e91f2e6a</a> |
| DSM                                   | Akulon® FL-LP PA6               | <a href="http://matweb.com/search/DataSheet.aspx?MatGUID=4256e304c46a427fad5eef1cda98afaf">http://matweb.com/search/DataSheet.aspx?MatGUID=4256e304c46a427fad5eef1cda98afaf</a> |
| Grupo Repol                           | Dinalon® B1S25 PA6              | <a href="http://matweb.com/search/DataSheet.aspx?MatGUID=2264e87ee1394c8292e1aa62ab483499">http://matweb.com/search/DataSheet.aspx?MatGUID=2264e87ee1394c8292e1aa62ab483499</a> |
| Grupo Repol                           | Dinalon® B1V25 PA6              | <a href="http://matweb.com/search/DataSheet.aspx?MatGUID=2019d2a466214ce2979c98b7768a72a0">http://matweb.com/search/DataSheet.aspx?MatGUID=2019d2a466214ce2979c98b7768a72a0</a> |
| Grupo Repol                           | Dinalon® B3S25 PA6              | <a href="http://matweb.com/search/DataSheet.aspx?MatGUID=2fa1cb26afde4dd0a6c5b1b185e76f2a">http://matweb.com/search/DataSheet.aspx?MatGUID=2fa1cb26afde4dd0a6c5b1b185e76f2a</a> |
| Lanxess                               | Durethan® B 30 S FN30<br>000000 | <a href="http://matweb.com/search/DataSheet.aspx?MatGUID=8ddee30e62434624af849f9abe45d791">http://matweb.com/search/DataSheet.aspx?MatGUID=8ddee30e62434624af849f9abe45d791</a> |
| Lanxess                               | Durethan® B 30 S FN40<br>000000 | <a href="http://matweb.com/search/DataSheet.aspx?MatGUID=abf40efae4884cf6b6ed44e5256891df">http://matweb.com/search/DataSheet.aspx?MatGUID=abf40efae4884cf6b6ed44e5256891df</a> |
| Lati Industria<br>Termoplastici S.P.A | Latilub 62-10T PA6              | <a href="http://matweb.com/search/DataSheet.aspx?MatGUID=a49fa6a68d434fc7b220f98b38f112df">http://matweb.com/search/DataSheet.aspx?MatGUID=a49fa6a68d434fc7b220f98b38f112df</a> |
| Lati Industria<br>Termoplastici S.P.A | Latilub 62-15ST PA6             | <a href="http://matweb.com/search/DataSheet.aspx?MatGUID=714baacda36147cf90e9ff6c9d4d4f37">http://matweb.com/search/DataSheet.aspx?MatGUID=714baacda36147cf90e9ff6c9d4d4f37</a> |
| Nurel Engineering<br>Polymers         | Promyde® B30 P MI PA6           | <a href="http://matweb.com/search/DataSheet.aspx?MatGUID=bb92de2ebf484f669eb639fb22141999">http://matweb.com/search/DataSheet.aspx?MatGUID=bb92de2ebf484f669eb639fb22141999</a> |
| Nurel Engineering<br>Polymers         | Promyde® B30 P2 HI PA6          | <a href="http://matweb.com/search/DataSheet.aspx?MatGUID=581d628533ef4cb793190742fb26b850">http://matweb.com/search/DataSheet.aspx?MatGUID=581d628533ef4cb793190742fb26b850</a> |
| Solvay                                | TECHNYL® C 50 H2 PA6            | <a href="http://matweb.com/search/DataSheet.aspx?MatGUID=67290439286b4fc097162adeaec0e31e">http://matweb.com/search/DataSheet.aspx?MatGUID=67290439286b4fc097162adeaec0e31e</a> |
| Solvay                                | TECHNYL® C 236SI PA6            | <a href="http://matweb.com/search/DataSheet.aspx?MatGUID=91cde4bf2aa14daa949539ef8000d14a">http://matweb.com/search/DataSheet.aspx?MatGUID=91cde4bf2aa14daa949539ef8000d14a</a> |
| Teknor Apex                           | Chemlon® HY2SM Nylon<br>6       | <a href="http://matweb.com/search/DataSheet.aspx?MatGUID=418cd67465f24ebf9d7421908b725a5b">http://matweb.com/search/DataSheet.aspx?MatGUID=418cd67465f24ebf9d7421908b725a5b</a> |
| Teknor Apex                           | Chemlon® MD3G Nylon 6           | <a href="http://matweb.com/search/DataSheet.aspx?MatGUID=e0162b3559294e9689002d1ea202f22a">http://matweb.com/search/DataSheet.aspx?MatGUID=e0162b3559294e9689002d1ea202f22a</a> |
| Teknor Apex                           | Chemlon® MD4 Nylon 6            | <a href="http://matweb.com/search/DataSheet.aspx?MatGUID=d6cce451d7964ef1933ea74f81ca2da0">http://matweb.com/search/DataSheet.aspx?MatGUID=d6cce451d7964ef1933ea74f81ca2da0</a> |
| Ter Hell Plastic<br>GmbH              | Terez® PA6 7750 TK              | <a href="http://matweb.com/search/DataSheet.aspx?MatGUID=f03b24fb1b7944c7985b29374c05ca16">http://matweb.com/search/DataSheet.aspx?MatGUID=f03b24fb1b7944c7985b29374c05ca16</a> |
| Tisan                                 | TISLAMID® 6 UNR<br>Nylon 6      | <a href="http://matweb.com/search/DataSheet.aspx?MatGUID=245a5ba7feb94330b50ac7ed434b952d">http://matweb.com/search/DataSheet.aspx?MatGUID=245a5ba7feb94330b50ac7ed434b952d</a> |

---

---

Unitika Ltd.

CX-2500 PA6

<http://matweb.com/search/DataSheet.aspx?MatGUID=e009e28a28b74fc2be2876870b6b6fa2>

---
